# Supplementary material
Source: publisher figshare collection journal article supplement (https://diabetesjournals.figshare.com/ndownloader/files/31116208)
Supplement: Supplementary file 1 [file 31116208]

## **Supplementary Material**

### **Table of contents**

Text S1. The Danish national health registers.

Text S2. Detailed description of methods used to identify GDM and type 2 diabetes

Text S3. Sensitivity analysis for violations of uncontrolled confounding assumptions in causal mediation analysis

Table S1. Definition of CVD

Table S2. Baseline characteristics by history of GDM among 1 002 486 Danish women during 1978-2016

Table S3. Sensitivity analyses for the associations between history of GDM and overall CVD

Table S4. Sensitivity analyses of the influence of uncontrolled mediator-outcome confounding

Figure S1. Causal diagram showing selection of covariates for confounding control

Figure S2. The proportion of pregnant women with gestational diabetes, by time period of delivery

Figure S3. Cumulative incidence of CVD among women with and without a history of GDM

**Text S1. The Danish national health registers.**

The Danish National Health Service provides tax-funded universal access to healthcare, guaranteeing free access to general practitioners and hospitals, and part reimbursement for prescribed drug treatment. All Danish residents are assigned a unique central personal register number (CPR), and individual data from national registries can be linked using the CPR (1,2).

The Danish Civil Registration System(2) contains data on vital statistics, emigration, sex, date and place of birth, place of residence, marriage, and lineage to relatives.

The Danish Medical Birth Registry(3) was established in 1968. The Danish Medical Birth Registry includes various characteristics of the new-borns, such as the date of birth, sex, gestational age, birth weight, singleton or not, maternal smoking during pregnancy since 1991.

The Danish National Patient Register (4) contains hospital discharge diagnoses from 1977 and outpatient and emergency diagnoses are included since 1995. The diagnoses are classified according to the *International Classification of Disease* codes (ICD-8 codes during 1977-1993 and ICD-10 codes thereafter).

The Danish Register of Causes of Death(5) has been computerized since 1970 and contains information on the date and causes of death of all citizens in Denmark(ICD-8 codes during 1970-1993 and ICD-10 codes thereafter).

The Danish Integrated Database for Longitudinal Labour Market Research(6) contains information on education and personal labour market affiliation.

## Text S2. Detailed description of methods used to identify GDM and type 2 diabetes.

Information on diagnoses of gestational diabetes (GDM) and type 2 diabetes was obtained from the Danish National Diabetes Register (1995-2016) (7), the Danish National Patient Registry (1977-2016) (8), and the Danish National Prescription Registry (1994-2016) (9) using *International Classification of Disease* codes (ICD-8 codes during 1970-1993 and ICD-10 codes since 1994) and *Anatomical Therapeutic Chemical* (ATC) classification codes.

The Danish National Diabetes Register contains information on diabetes since 1995, using the following criteria: #1. ICD-10 diagnosis code (not gestational diabetes), #2.  $\geq 2$  redeemed prescriptions for insulin or oral antidiabetic drugs from the Register of Medicinal Product Statistics, #3. receipt of chiropody for diabetic patients, #4. five glucose measurements within one year or two blood glucose measurements per year during five consecutive years, as recorded in The National Health Insurance Service Registry. We did not use blood glucose measurements alone due to their poor validity. In addition to using criteria #1 (ICD-10 diagnosis code), we also used criteria #2 (medication), and criteria #3 (chiropody) to identify diabetes. In addition, we classified women who redeemed two prescriptions for insulin within six months as having type 1 diabetes, and those with 2 redeemed prescriptions for oral antidiabetic medications within six months or chiropody for diabetic patients as having type 2 diabetes.

|                      | <b>ICD-8 codes</b> | <b>ICD-10 codes</b> | <b>ATC Codes</b> |
|----------------------|--------------------|---------------------|------------------|
| Gestational diabetes | 634.74, Y6449      | O24.4, O24.9        |                  |
| Type 2 diabetes      | 250                | E11, O24.1          | A10B*            |

\* Two redeemed prescriptions within six months

Because diabetes was recorded using a single code (250) from 1977 to 1986, two methods were used to distinguish between type 1 diabetes and type 2 diabetes during 1977-1986: 1) a specific code for type 1 diabetes or type 2 diabetes recorded later in time, 2) type 1 diabetes if age at diabetes onset < 30 years, otherwise type 2 diabetes (10-12).

Overall, ascertainment and verification of diabetes in Denmark are considered highly reliable and the estimated completeness (sensitivity) of diagnosed diabetes in the Danish National Diabetes Register is

93%-95% (1,13). Regarding the validation of diabetes in the Danish National Patient Registry, the number of reviewed records is small in most studies (see Table below). Two validation studies with over 1400 records suggest that type 1 diabetes diagnoses are of high quality (both PPV and sensitivity >91%).

Table-Validation studies of diabetes in the Danish National Patient Registry

| Study                          | Condition                   | Study period | ICD codes                                                                                 | Reviewed records | PPV; NPV; sensitivity (Se); specificity (Sp)                                       | Reference standard                                                 |
|--------------------------------|-----------------------------|--------------|-------------------------------------------------------------------------------------------|------------------|------------------------------------------------------------------------------------|--------------------------------------------------------------------|
| Thygesen 2011 <sup>14</sup>    | Diabetes                    | 1998–2007    | E10.0, E10.1, E10.9, E11.0, E11.1, E11.9                                                  | 50               | PPV =96.0 (86.5–98.9)                                                              | Discharge summaries                                                |
| Kristensen 2007 <sup>15</sup>  |                             | 1999–2003    | E10–13, H36.0, O24, except O24.4                                                          | NA               | PPV =64; Se =97                                                                    | General practitioner verification                                  |
| Thomsen 2004 <sup>16</sup>     |                             | 1992–2001    | 249–250, E10–E11, also prescription for insulin or an oral antidiabetic drug (A10A, A10B) | 65               | PPV=96.9 (89.5–99.2)                                                               | Medical records, Clinical Laboratory System Database               |
| Atladdottir 2009 <sup>17</sup> | Diabetes in women           | 1977–2006    | 249; E10                                                                                  | 40               | PPV =95.0 (83.5–98.6)                                                              | Medical records                                                    |
| Svensson 2007 <sup>18</sup>    | Diabetes in children(<15 y) | 1996–2002    | E10–14                                                                                    | 1479             | PPV =95.9 (94.8–96.8); NPV =100(100–100); Se =97.9 (97.1–98.6); Sp =100 (100–100)  | Medical records; Danish Registry for Child and Adolescent Diabetes |
| Svensson 2007 <sup>18</sup>    | Type 1 diabetes             | 1996–2002    | E10–14                                                                                    | 1479             | PPV =94.3 (93.0–95.4); NPV =100(100–100); Se =98.0 (97.1–98.6); Sp =100 (100–100)  | Medical records; Danish Registry for Child and Adolescent Diabetes |
| Nielsen 1996 <sup>19</sup>     | Type 1 diabetes             | 1987–1993    | 249                                                                                       | 1722             | PPV =96.3 (95.4–97.1); Se =91.0(89.6–92.2)                                         | Medical records; Prescription Registry                             |
| Langhoff 2003 <sup>20</sup>    | Gestational diabetes        | 2001         | O24                                                                                       | 21               | PPV =100 (84.5–100); NPV =99.7(99.2–99.9); Se =87.5(69.0–95.7); Sp =100 (99.7–100) | Medical records                                                    |

**Text S3. Sensitivity analysis for violations of uncontrolled confounding assumptions in causal mediation analysis.**

The mediation analysis was conducted under strong assumptions of no uncontrolled confounding of the GDM–CVD (i.e. exposure–outcome) relationship and of the type 2 diabetes–CVD (i.e. mediator–outcome) relation. Under these assumptions as well as the assumptions of positivity, consistency, no other sources bias and no model misspecification, sensitivity analysis was performed to focus on the evaluation of the possible violations of the no uncontrolled mediator-outcome confounding assumptions only (13,14).

Specifically, we considered a binary unmeasured confounding variable  $U$  that is a common cause of type 2 diabetes and CVD (e. g., alcohol use, diet, or psychological stress). We assumed that the prevalence of  $U$  was 20% and 30% for women with and without GDM conditional on type 2 diabetes, respectively (Table S4). We also considered a simplified assumption that the prevalence of  $U$  was the same among women with and without GDM. For the magnitude of the association between  $U$  and CVD conditional on GDM and type 2 diabetes, we assessed the influence of unmeasured mediator-outcome confounding in two settings: (i) moderate confounding, where we assumed if  $U$  elevated CVD risk by a factor of 1.4; and (ii) strong confounding where we assumed if  $U$  elevated CVD risk by a factor of 2.

Under the simplified assumption that the prevalence of  $U$  was the same in women with and without GDM, the estimate of controlled direct effect (CDE) was unchanged. If the prevalence of  $U$  was assumed to be higher in women with GDM compared with those without GDM, the bias-adjusted CDE would be lower than the original CDE and the proportion eliminated would be higher. However, if the prevalence of  $U$  was assumed to be lower in women with GDM compared with those without GDM, the bias-adjusted CDE would be higher than the original CDE (Table S4).

## References

1. Schmidt M, Schmidt SAJ, Adelborg K, Sundboll J, Laugesen K, Ehrenstein V, Sorensen HT. The Danish health care system and epidemiological research: from health care contacts to database records. *Clin Epidemiol* 2019;11:563-591
2. Schmidt M, Pedersen L, Sorensen HT. The Danish Civil Registration System as a tool in epidemiology. *Eur J Epidemiol* 2014;29:541-549
3. Knudsen LB, Olsen J. The Danish Medical Birth Registry. *Dan Med Bull* 1998;45:320-323
4. Lynge E, Sandegaard JL, Rebolj M. The Danish National Patient Register. *Scand J Public Health* 2011;39:30-33
5. Helweg-Larsen K. The Danish Register of Causes of Death. *Scand J Public Health* 2011;39:26-29
6. Petersson F, Baadsgaard M, Thygesen LC. Danish registers on personal labour market affiliation. *Scand J Public Health* 2011;39:95-98
7. Carstensen B, Kristensen JK, Ottosen P, Borch-Johnsen K, Steering Group of the National Diabetes R. The Danish National Diabetes Register: trends in incidence, prevalence and mortality. *Diabetologia* 2008;51:2187-2196
8. Andersen TF, Madsen M, Jorgensen J, Mellemkjoer L, Olsen JH. The Danish National Hospital Register. A valuable source of data for modern health sciences. *Dan Med Bull* 1999;46:263-268
9. Kildemoes HW, Sorensen HT, Hallas J. The Danish National Prescription Registry. *Scand J Public Health* 2011;39:38-41
10. Feltbower RG, McKinney PA, Campbell FM, Stephenson CR, Bodansky HJ. Type 2 and other forms of diabetes in 0-30 year olds: a hospital based study in Leeds, UK. *Arch Dis Child* 2003;88:676-679
11. Oyen N, Diaz LJ, Leirgul E, Boyd HA, Priest J, Mathiesen ER, Quertermous T, Wohlfahrt J, Melbye M. Prepregnancy Diabetes and Offspring Risk of Congenital Heart Disease: A Nationwide Cohort Study. *Circulation* 2016;133:2243-2253
12. Yu Y, Arah OA, Liew Z, Cnattingius S, Olsen J, Sorensen HT, Qin G, Li J. Maternal diabetes during pregnancy and early onset of cardiovascular disease in offspring: population based cohort study with 40 years of follow-up. *BMJ* 2019;367:l6398
13. Green A, Sortso C, Jensen PB, Emneus M. Validation of the danish national diabetes register. *Clin Epidemiol* 2015;7:5-15
14. Thygesen SK, Christiansen CF, Christensen S, Lash TL, Sørensen HT. The predictive value of ICD-10 diagnostic coding used to assess Charlson comorbidity index conditions in the population-based Danish National Registry of Patients. *BMC Med Res Methodol* 2011;11:1-6
15. Kristensen JK, Drivsholm TB, Carstensen B, Steding-Jensen M, Green A. Validation of methods to identify known diabetes on the basis of health registers. *Ugeskr Laeger* 2007;169:1687-1692
16. Thomsen RW, Hundborg HH, Lervang H-H, Johnsen SP, Sørensen HT, Schønheyder HC. Diabetes and outcome of community-acquired pneumococcal bacteremia: a 10-year population-based cohort study. *Diabetes Care* 2004;27:70-76
17. Atladóttir HÓ, Pedersen MG, Thorsen P, Mortensen PB, Deleuran B, Eaton WW, Parner ET. Association of family history of autoimmune diseases and autism spectrum disorders. *Pediatrics* 2009;124:687-694
18. Svensson J, Marinelli K, Eising S. Landspatientregisteret over for et specialespecifikt register for diabetes i barnealderen? *Ugeskr Laeger* 2007;169:122
19. Nielsen GL, Sørensen HT, Pedersen AB, Sabroe S. Analyses of data quality in registries concerning diabetes mellitus—a comparison between a population based hospital discharge and an insulin prescription registry. *J Med Syst* 1996;20:1-10
20. Langhoff-Roos J, Rasmussen S. Danish Health and Medicines Authority. [Validering af Landspatientregistret (LPR) mhp. obstetrisk forskning og kvalitetssikring] Copenhagen. 2003;

21. VanderWeele T. *Explanation in causal inference: methods for mediation and interaction*. Oxford University Press, 2015
22. VanderWeele TJ. Bias formulas for sensitivity analysis for direct and indirect effects. *Epidemiology* 2010;21:540-551

**Table S1. Definition of cardiovascular disease\***

|                                          | <b>ICD-8</b>                                     | <b>ICD-10</b>                | <b>Procedure/Surgery Codes</b>                                                                                                                                                                                 |
|------------------------------------------|--------------------------------------------------|------------------------------|----------------------------------------------------------------------------------------------------------------------------------------------------------------------------------------------------------------|
| Overall cardiovascular disease (CVD)     | 390-444.1, 444.3-458, 782.4                      | I00-I99                      | 30350, 30354, 30240, KFNG, KFNF<br>30009, 30019, 30029, 30039, 30049, 30059, 30069, 30079, 30089, 30099, 30109, 30119, 30120, 30129, 30139, 30149, 30159, 30169, 30179, 30189, 30199, 30200, KFNA-KFNE, KFNH20 |
| Ischemic heart disease                   | 410-414                                          | I20-I25                      |                                                                                                                                                                                                                |
| Myocardial infarction                    | 410                                              | I21                          |                                                                                                                                                                                                                |
| Cerebrovascular disease                  | 430-438                                          | I60-I69                      |                                                                                                                                                                                                                |
| Stroke                                   | 430-436                                          | I61-I64                      |                                                                                                                                                                                                                |
| Ischemic stroke                          | 433-434                                          | I63-I64                      |                                                                                                                                                                                                                |
| Heart failure                            | 427.0, 427.1, 782.4                              | I110, I130, I132, I50        |                                                                                                                                                                                                                |
| Atrial fibrillation                      | 427.93, 427.94                                   | I48                          |                                                                                                                                                                                                                |
| Hypertensive disease                     | 400-404                                          | I10-I15                      |                                                                                                                                                                                                                |
| Deep vein thrombosis                     | 451.00                                           | I80.1-I80.3                  |                                                                                                                                                                                                                |
| Pulmonary embolism                       | 450.99                                           | I26                          |                                                                                                                                                                                                                |
| Peripheral artery disease                | 44389-44399                                      | I739                         |                                                                                                                                                                                                                |
| Coronary artery bypass graft (CABG)      |                                                  |                              | 30009, 30019, 30029, 30039, 30049, 30059, 30069, 30079, 30089, 30099, 30109, 30119, 30120, 30129, 30139, 30149, 30159, 30169, 30179, 30189, 30199, 30200, KFNA-KFNE, KFNH20                                    |
| Percutaneous coronary intervention (PCI) |                                                  |                              | 30350, 30354, 30240, KFNG, KFNF                                                                                                                                                                                |
| Other CVDs                               | Remainder of codes (390-444.1, 444.3-458, 782.4) | Remainder of codes (I00-I99) | Without the surgery codes above for PCI and CABG                                                                                                                                                               |

\* The information on cardiovascular disease is from the Danish National Patient Registry or the Danish Register of Cause of Death.



**Table S2. Baseline characteristics by history of GDM among 1 002 486 Danish women during 1978-2016**

|                                       | No. (%)                    |                                |
|---------------------------------------|----------------------------|--------------------------------|
| Variable                              | History of GDM* (n=21,353) | No history of GDM* (n=981,133) |
| Parity                                |                            |                                |
| 1                                     | 5,075 (24)                 | 273,897 (28)                   |
| 2                                     | 9,585 (45)                 | 485,976 (50)                   |
| ≥3                                    | 6,693 (31)                 | 221,260 (23)                   |
| Age at first delivery, years          |                            |                                |
| <20                                   | 803 (4)                    | 40,173 (4)                     |
| 20-24                                 | 4,896 (23)                 | 277,333 (28)                   |
| 25-29                                 | 7,985 (37)                 | 402,170 (41)                   |
| 30-34                                 | 5,247 (25)                 | 197,548 (20)                   |
| 35+                                   | 2,422 (11)                 | 63,909 (7)                     |
| Smoking during pregnancy <sup>†</sup> |                            |                                |
| No                                    | 15,256 (79)                | 512,942 (77)                   |
| Yes                                   | 3,278 (17)                 | 123,130 (18)                   |
| Unknown                               | 876 (5)                    | 31,240 (5)                     |
| Education, years                      |                            |                                |
| 0-9                                   | 5,347 (25)                 | 241,854 (25)                   |
| 10-14                                 | 9,401 (44)                 | 438,652 (45)                   |
| 15+                                   | 5,429 (25)                 | 268,854 (27)                   |
| Unknown                               | 1,176 (6)                  | 31,773 (3)                     |
| Cohabitation                          |                            |                                |
| No                                    | 11,534 (54)                | 578,557 (59)                   |
| Yes                                   | 9,786 (46)                 | 399,343 (41)                   |
| Unknown                               | 33 (0)                     | 3,233 (0)                      |
| Residence                             |                            |                                |
| Copenhagen                            | 2,562 (12)                 | 143,631 (15)                   |
| Big cities≥100,000 inhabitants        | 3,115 (15)                 | 137,027 (14)                   |
| Others                                | 15,676 (73)                | 700,475 (71)                   |
| Country of origin                     |                            |                                |
| Non-Danish origin                     | 5,431 (25)                 | 122,941 (13)                   |
| Danish origin                         | 15,911 (75)                | 854,315 (87)                   |
| Unknown                               | 11 (0)                     | 3,877 (0)                      |
| Pre-pregnancy Obesity                 |                            |                                |
| No                                    | 17,435 (82)                | 943,866 (96)                   |
| Yes                                   | 3,918 (18)                 | 37,267 (4)                     |
| Subsequent type 2 diabetes            |                            |                                |
| No                                    | 18,547 (87)                | 963,373 (98)                   |
| Yes                                   | 2,806 (13)                 | 17,760 (2)                     |

|                         |            |              |
|-------------------------|------------|--------------|
| Maternal history of CVD |            |              |
| No                      | 8,389 (39) | 386,326 (39) |
| Yes                     | 8,790 (41) | 445,890 (45) |
| Unknown                 | 4,174 (20) | 148,917 (15) |
| Paternal history of CVD |            |              |
| No                      | 7,132 (33) | 327,319 (33) |
| Yes                     | 9,794 (46) | 488,434 (50) |
| Unknown                 | 4,427 (21) | 165,380 (17) |

\* Expressed as frequency (percentage). Percentages have been rounded and may not total to 100%.

† Smoking during pregnancy was available from 1991 to 2016.

Abbreviation: GDM=gestational diabetes mellitus, CVD=cardiovascular disease.

**Table S3. Sensitivity analyses for the associations between history of GDM and overall CVD**

|                                                                     | <b>History of GDM</b> | <b>No. of CVD cases</b> | <b>Rate per 1000 person-years</b> | <b>HR (95%CI) Model 1</b> | <b>HR (95%CI) Model 2</b> |
|---------------------------------------------------------------------|-----------------------|-------------------------|-----------------------------------|---------------------------|---------------------------|
| <b>Age as time scale</b>                                            | No GDM                | 182805                  | 10.82                             | 1.0 (ref)                 | 1.0 (ref)                 |
|                                                                     | GDM                   | 3015                    | 16.84                             | 1.62(1.56-1.67)           | 1.38(1.33-1.43)           |
| <b>Women without preeclampsia/eclampsia</b>                         | No GDM                | 167813                  | 10.48                             | 1.0 (ref)                 | 1.0 (ref)                 |
|                                                                     | GDM                   | 2461                    | 15.43                             | 1.65(1.59-1.72)           | 1.36(1.30-1.41)           |
| <b>Women with at least 1 year of follow-up</b>                      | No GDM                | 177680                  | 10.52                             | 1.0 (ref)                 | 1.0 (ref)                 |
|                                                                     | GDM                   | 2892                    | 16.20                             | 1.71(1.65-1.77)           | 1.42(1.37-1.48)           |
| <b>Women with only 1 pregnancy</b>                                  | No GDM                | 39134                   | 11.33                             | 1.0 (ref)                 | 1.0 (ref)                 |
|                                                                     | GDM                   | 438                     | 16.09                             | 2.03(1.85-2.23)           | 1.43(1.30-1.57)           |
| <b>Complete case analysis</b>                                       | No GDM                | 69266                   | 10.11                             | 1.0 (ref)                 | 1.0 (ref)                 |
|                                                                     | GDM                   | 1671                    | 14.99                             | 1.48(1.41-1.55)           | 1.35(1.29-1.42)           |
| <b>Women without stillbirth</b>                                     | No GDM                | 181819                  | 10.81                             | 1.0 (ref)                 | 1.0 (ref)                 |
|                                                                     | GDM                   | 2968                    | 16.78                             | 1.73(1.67-1.79)           | 1.42(1.37-1.47)           |
| <b>Stratified by year of delivery</b>                               | No GDM                | 182805                  | 10.82                             | 1.0 (ref)                 | 1.0 (ref)                 |
|                                                                     | GDM                   | 3015                    | 16.84                             | 1.73(1.67-1.80)           | 1.41(1.36-1.47)           |
| <b>Multiple imputation</b>                                          | No GDM                | 182805                  | 10.82                             | 1.0 (ref)                 | 1.0 (ref)                 |
|                                                                     | GDM                   | 3015                    | 16.84                             | 1.73(1.67-1.80)           | 1.40(1.35-1.45)           |
| <b>Spline function for age and calendar year*</b>                   | No GDM                | 182805                  | 10.82                             | 1.0 (ref)                 | 1.0 (ref)                 |
|                                                                     | GDM                   | 3015                    | 16.84                             | 1.73(1.67-1.80)           | 1.39(1.34-1.44)           |
| <b>Women with 1st pregnancy after 1980</b>                          | No GDM                | 163395                  | 10.71                             | 1.0 (ref)                 | 1.0 (ref)                 |
|                                                                     | GDM                   | 2962                    | 16.74                             | 1.69(1.63-1.75)           | 1.40(1.35-1.45)           |
| <b>Women with 1st pregnancy after 1985</b>                          | No GDM                | 125342                  | 10.49                             | 1.0 (ref)                 | 1.0 (ref)                 |
|                                                                     | GDM                   | 2767                    | 16.33                             | 1.59(1.53-1.65)           | 1.39(1.34-1.45)           |
| <b>Women with 1st pregnancy after 1991</b>                          | No GDM                | 81007                   | 10.09                             | 1.0 (ref)                 | 1.0 (ref)                 |
|                                                                     | GDM                   | 2141                    | 15.07                             | 1.48(1.42-1.55)           | 1.35(1.29-1.41)           |
| <b>Women with 1st pregnancy after 1994</b>                          | No GDM                | 61363                   | 9.84                              | 1.0 (ref)                 | 1.0 (ref)                 |
|                                                                     | GDM                   | 1781                    | 14.28                             | 1.43(1.36-1.50)           | 1.32(1.25-1.38)           |
| <b>Women with 1st pregnancy after 2000</b>                          | No GDM                | 31735                   | 9.33                              | 1.0 (ref)                 | 1.0 (ref)                 |
|                                                                     | GDM                   | 1125                    | 12.96                             | 1.36(1.29-1.45)           | 1.24(1.17-1.32)           |
| <b>Women with 1st pregnancy after 2005</b>                          | No GDM                | 14281                   | 8.53                              | 1.0 (ref)                 | 1.0 (ref)                 |
|                                                                     | GDM                   | 596                     | 11.71                             | 1.36(1.25-1.47)           | 1.20(1.11-1.31)           |
| <b>Additional adjustment for gestational age</b>                    | No GDM                | 182805                  | 10.82                             | 1.0 (ref)                 | 1.0 (ref)                 |
|                                                                     | GDM                   | 3015                    | 16.84                             | 1.73(1.67-1.80)           | 1.39(1.34-1.44)           |
| <b>Additional adjustment for pre-pregnancy hypercholesterolemia</b> | No GDM                | 182805                  | 10.82                             | 1.0 (ref)                 | 1.0 (ref)                 |
|                                                                     | GDM                   | 3015                    | 16.84                             | 1.73(1.67-1.80)           | 1.40(1.35-1.45)           |

|                                                                                            |        |        |       |                 |                 |
|--------------------------------------------------------------------------------------------|--------|--------|-------|-----------------|-----------------|
| <b>Additional adjustment for pre-pregnancy Charlson Comorbidity Index score (0, 1, 2+)</b> | No GDM | 182805 | 10.82 | 1.0 (ref)       | 1.0 (ref)       |
|                                                                                            | GDM    | 3015   | 16.84 | 1.73(1.67-1.80) | 1.39(1.34-1.44) |

\* Spline function for age at first pregnancy and calendar year (restricted cubic spline with five knots at five evenly spaced)

Abbreviations: GDM=gestational diabetes mellitus; CVD=cardiovascular disease; HR=hazard ratio; CI=confidence interval; ref=reference.

1 **Table S4. Sensitivity analyses of the influence of uncontrolled mediator-outcome confounding** <sup>\*, †, ‡, §</sup>

| CVD                              | Original results |                   |                  |                          | Moderate unmeasured confounding<br>(HR <sub>U</sub> =1.4) |                  |                          | Strong unmeasured confounding<br>(HR <sub>U</sub> =2) |                  |                          |
|----------------------------------|------------------|-------------------|------------------|--------------------------|-----------------------------------------------------------|------------------|--------------------------|-------------------------------------------------------|------------------|--------------------------|
|                                  | HR <sub>TE</sub> | HR <sub>CDE</sub> | HR <sub>PE</sub> | Proportion<br>eliminated | HR <sub>CDE</sub>                                         | HR <sub>PE</sub> | Proportion<br>eliminated | HR <sub>CDE</sub>                                     | HR <sub>PE</sub> | Proportion<br>eliminated |
| <b>Overall CVD</b>               | 1.40             | 1.31              | 1.07             | 23%                      | 1.35                                                      | 1.03             | 11%                      | 1.41                                                  | 0.99             | -                        |
| <b>Type-specific CVDs</b>        |                  |                   |                  |                          |                                                           |                  |                          |                                                       |                  |                          |
| <b>Ischemic heart disease</b>    | 2.02             | 1.77              | 1.14             | 25%                      | 1.83                                                      | 1.10             | 19%                      | 1.92                                                  | 1.06             | 11%                      |
| <b>Myocardial infarction</b>     | 2.35             | 1.83              | 1.28             | 38%                      | 1.90                                                      | 1.24             | 33%                      | 1.98                                                  | 1.18             | 27%                      |
| <b>Cerebrovascular disease</b>   | 1.47             | 1.46              | 1.01             | 2%                       | 1.52                                                      | 0.97             | -                        | 1.59                                                  | 0.93             | -                        |
| <b>Stroke</b>                    | 1.65             | 1.59              | 1.04             | 10%                      | 1.65                                                      | 1.00             | 1%                       | 1.72                                                  | 0.96             | -                        |
| <b>Ischaemic stroke</b>          | 1.73             | 1.58              | 1.09             | 20%                      | 1.64                                                      | 1.05             | 12%                      | 1.72                                                  | 1.01             | 2%                       |
| <b>Heart failure</b>             | 2.20             | 1.43              | 1.54             | 64%                      | 1.48                                                      | 1.48             | 60%                      | 1.55                                                  | 1.42             | 54%                      |
| <b>Atrial fibrillation</b>       | 1.40             | 1.24              | 1.13             | 39%                      | 1.29                                                      | 1.09             | 28%                      | 1.35                                                  | 1.04             | 14%                      |
| <b>Hypertensive disease</b>      | 2.63             | 2.08              | 1.26             | 34%                      | 2.16                                                      | 1.22             | 29%                      | 2.25                                                  | 1.17             | 23%                      |
| <b>Deep vein thrombosis</b>      | 1.46             | 1.47              | 0.99             | -                        | 1.52                                                      | 0.96             | -                        | 1.59                                                  | 0.92             | -                        |
| <b>Pulmonary embolism</b>        | 1.33             | 1.37              | 0.97             | -                        | 1.42                                                      | 0.93             | -                        | 1.49                                                  | 0.89             | -                        |
| <b>Peripheral artery disease</b> | 2.19             | 1.28              | 1.71             | 76%                      | 1.33                                                      | 1.65             | 72%                      | 1.39                                                  | 1.58             | -                        |
| <b>CABG or PCI</b>               | 2.89             | 1.76              | 1.65             | 60%                      | 1.82                                                      | 1.59             | 57%                      | 1.90                                                  | 1.52             | 52%                      |
| <b>Other CVDs</b>                | 1.06             | 1.07              | 0.98             | -                        | 1.11                                                      | 0.95             | -                        | 1.16                                                  | 0.91             | -                        |

2 <sup>\*</sup> Proportion eliminated: = (HR<sub>TE</sub> – HR<sub>CDE</sub>)/(HR<sub>TE</sub>-1), only present if the direction of CDE and PE was the same.

3 <sup>†</sup> Original results: the primary result of this study (Table 2).

4 <sup>‡</sup> HR<sub>U</sub>: denotes the effect if unmeasured confounding U increased the likelihood of the CVD risk by a factor of 1.4 or 2.

5 <sup>§</sup> The prevalence of U was 20% and 30% for women with and without GDM conditional on type 2 diabetes, respectively.

6 Abbreviations: CVD=cardiovascular disease; CABG=coronary artery bypass graft; PCI=percutaneous coronary intervention; HR=hazard ratio;  
7 TE=total effect; CDE= controlled direct effect; PE=portion eliminated.

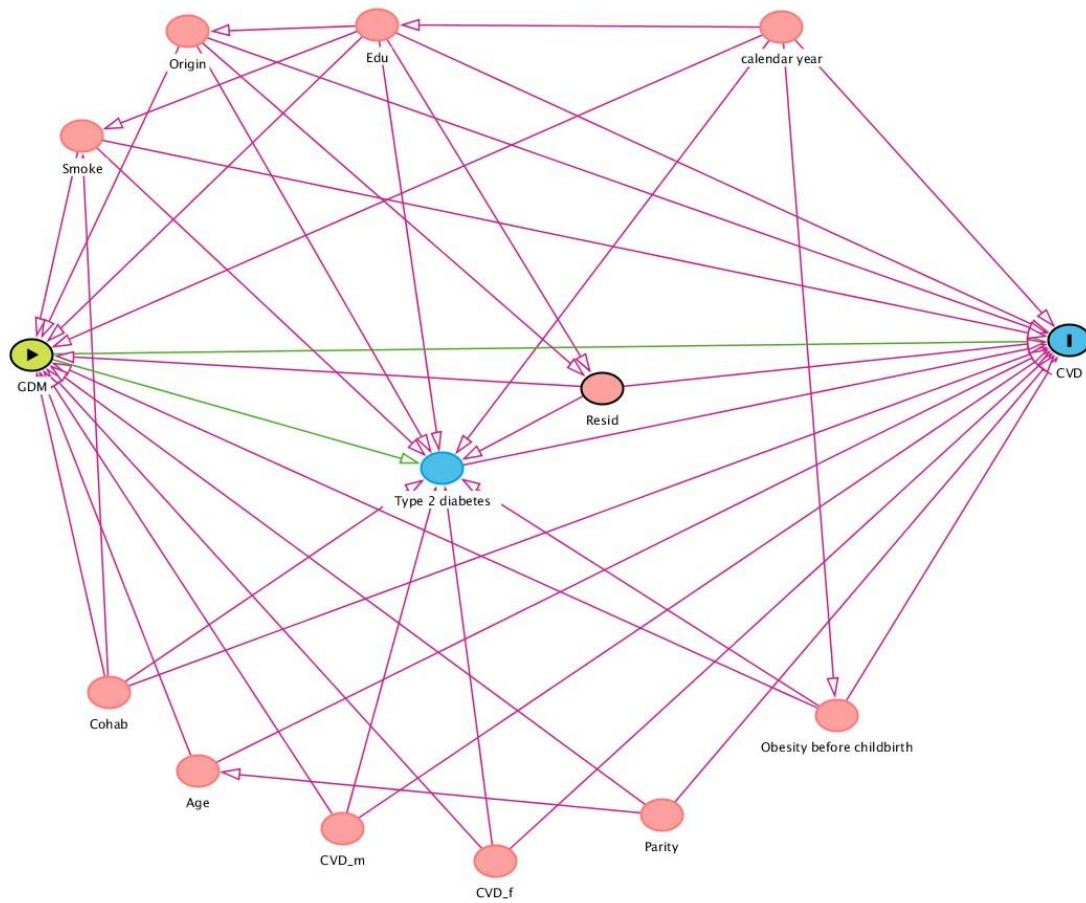

**Figure S1. Causal diagram used to select covariates for confounding control \***

\* GDM: gestational diabetes mellitus, age: age at first delivery, cohab: cohabitation, edu: education, origin: country of origin, resid: residence, smoke: smoking during pregnancy, CVD\_m and CVD\_f: maternal and paternal CVD history.

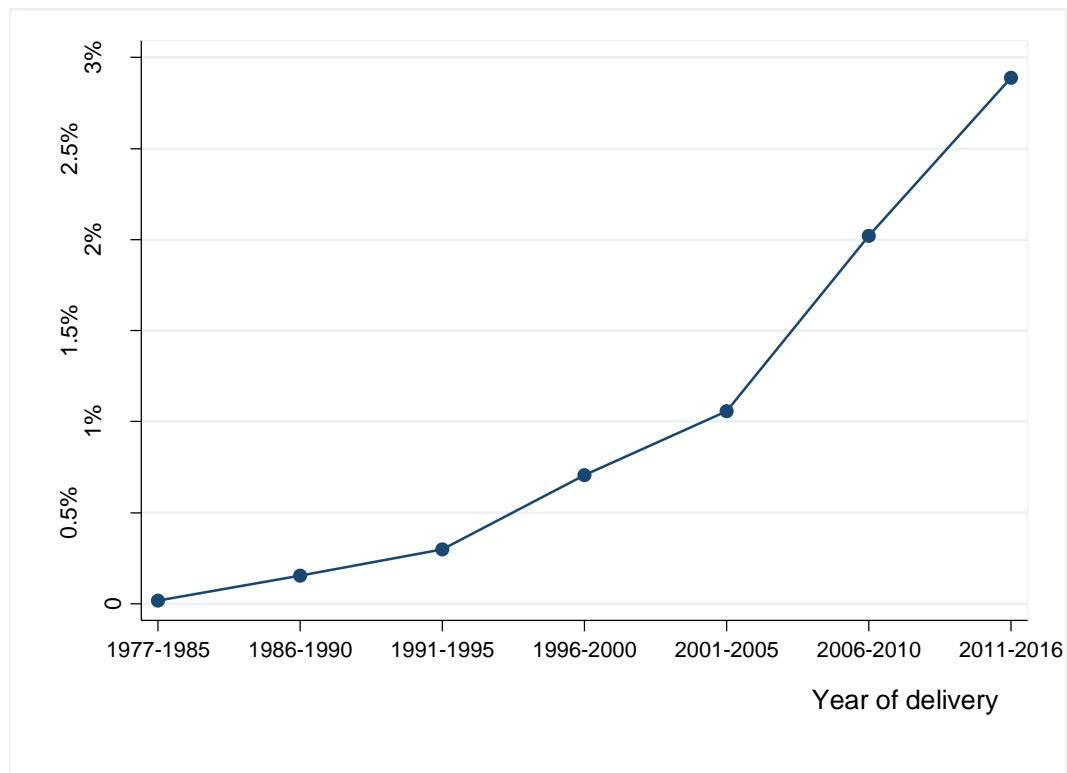

**Figure S2. The proportion of pregnant women with gestational diabetes, by time period of delivery**

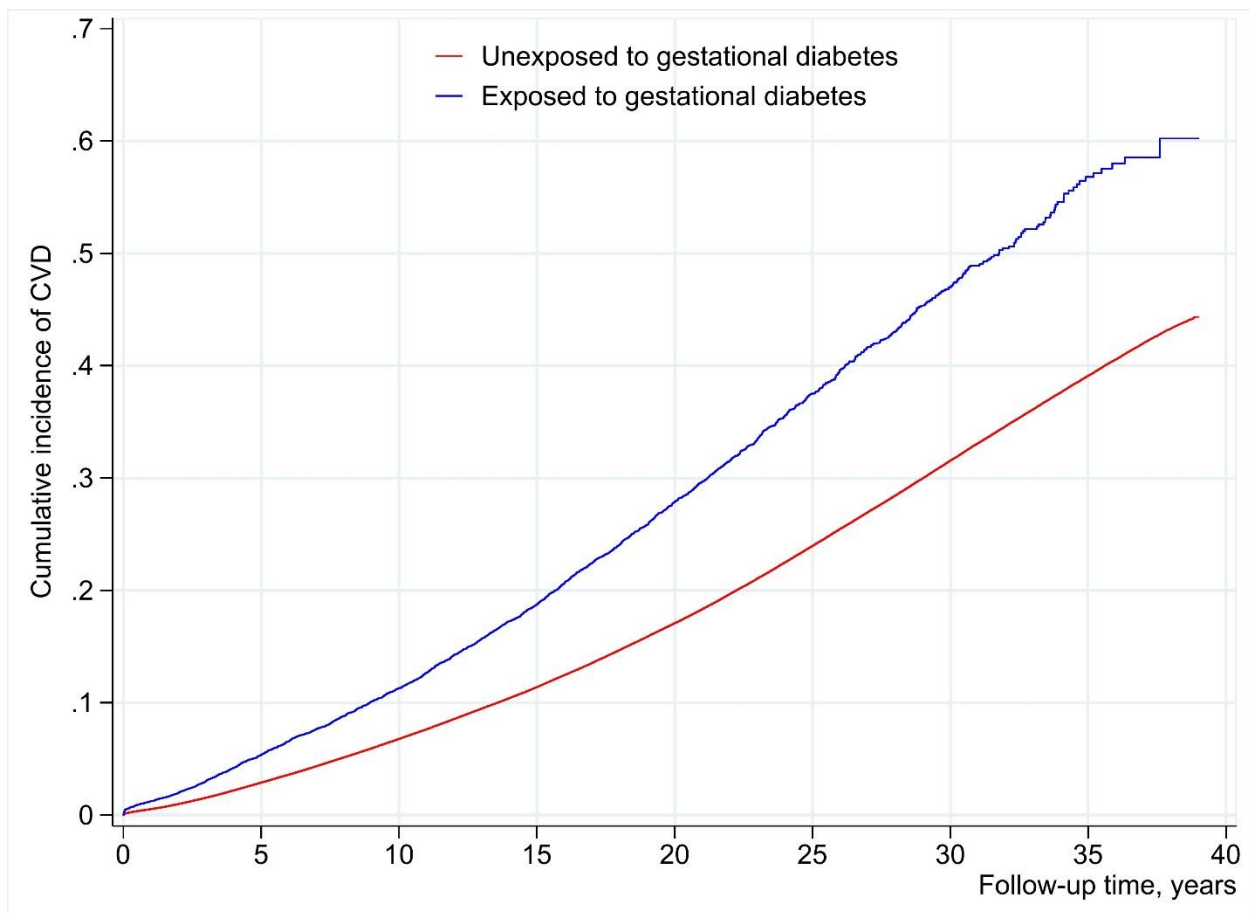

**Number at risk**

|                  |         |         |         |         |         |         |         |        |   |
|------------------|---------|---------|---------|---------|---------|---------|---------|--------|---|
| <b>Unexposed</b> | 992 606 | 829 461 | 678 161 | 534 446 | 394 189 | 259 466 | 144 753 | 59 515 | 0 |
| <b>Exposed</b>   | 9880    | 10 778  | 8746    | 6045    | 3509    | 1580    | 540     | 126    | 0 |

**Figure S3. Cumulative incidence of CVD among women with and without a history of GDM**

Abbreviation: CVD=cardiovascular disease; GDM=gestational diabetes mellitus.
